# Supplementary material for: Informing the Design of Data Visualization Tools to Monitor the COVID-19 Pandemic in Portugal: A Web-Delphi Participatory Approach
Source: MDPI journal article supplement (doi:10.3390/ijerph191711012), 2022-09-02
Supplement: s1 [file s1]

## Supplementary Material S1

### Consentimento Informado

Ao clicar "Continuar":

- Concordo em participar no estudo "Developing data visualization tools to assist government's health policy responses to the COVID-19 pandemic in Portugal".
- A minha participação neste estudo é **voluntária** e posso desistir de participar em qualquer momento.
- Entendo que os meus dados serão tratados da **forma anónima**.
- Compreendo o significado das afirmações acima mencionadas.

Voltar

Continuar

**Figure S1.** Consent agreement screen. Trans. Consent agreement. By clicking "Continue": - I agree to participate in the study "Developing data visualization tools to assist government's health policy responses to the COVID-19 pandemic in Portugal". - My participation in this study is voluntary and I can opt out at any time. - I understand that my data will be treated anonymously. - I understand the meaning of the above statements.

### Caracterização sócio-demográfica

Qual é o seu género?

☐ Masculino

☐ Feminino

☐ Outro

**Figure S2.** Socio-demographic characterization screen. Trans. What is your gender? – Male; - Female - Other.

### Parte 1

Os seguintes formatos de visualização refletem a **evolução temporal do número de novos casos** ocorridos durante a pandemia.

1. Que formato de visualização considera ser o mais apropriado para representar o **número diário de novos casos confirmados de COVID-19**, tendo em conta **um intervalo de 3 meses (março-junho)**?

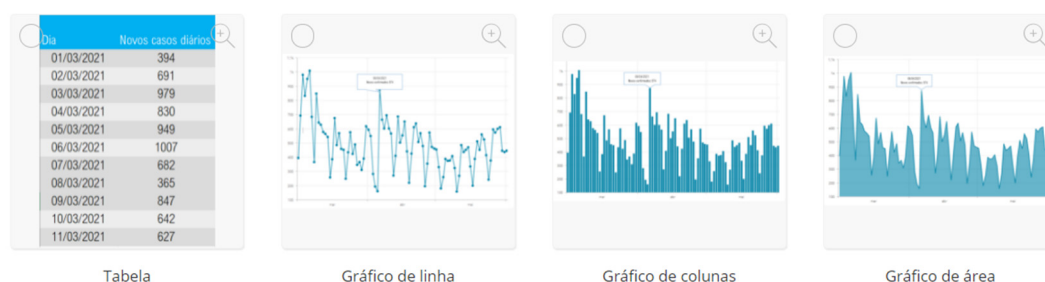

**Figure S3.** Example of screen in Part 1. Trans. The following visualization formats reflect the temporal evolution of the number of new cases that occurred during the pandemic. What visualization format

do you consider to be the most appropriate to represent a daily number of new confirmed COVID-19 cases, considering three-month time interval (March-June)? – Table; - Line Chart; - Column Chart; - Area Chart.

Caso considere relevante, poderá escrever um comentário que será compartilhado com os participantes na próxima ronda:

**Figure S4.** Example of comment's input area. Trans. If you consider it relevant, you can write a comment that will be shared with the participants in the next round.

## Parte 2

Os seguintes formatos de visualização refletem o número total de casos confirmados de COVID-19 desde o início de pandemia.

7. Que formato de visualização considera ser o mais apropriado para representar o número total de casos confirmados de COVID-19 por grupo etário?

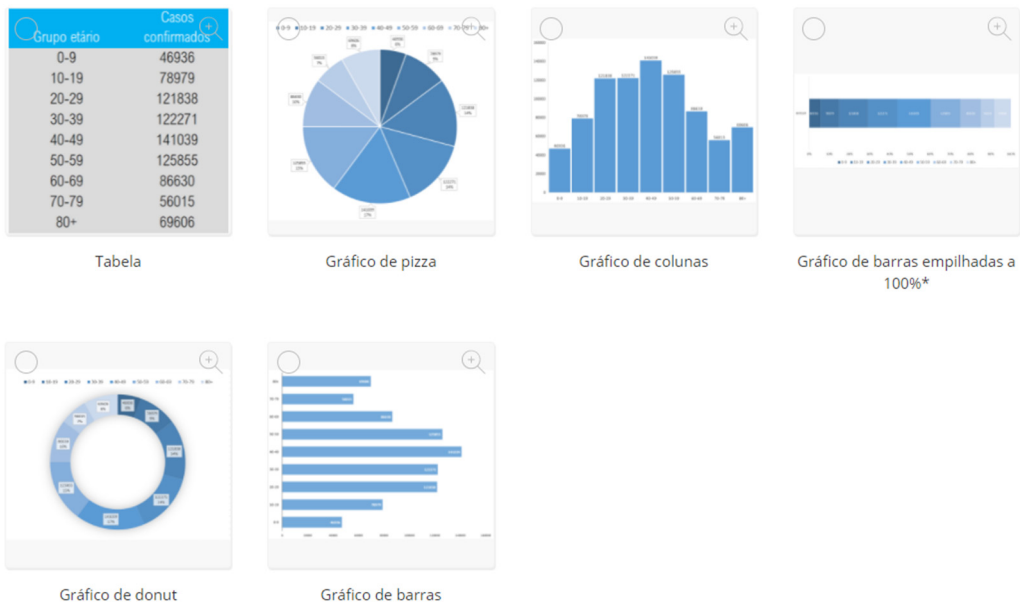

**Figure S5.** Example of screen in Part 2. Trans. What visualization format do you consider to be the most appropriate to represent a total number of confirmed COVID-19 cases by age group? – Table; - Pie Chart; - Column Chart; - 100% Stacked Bar Chart; Donut Chart; Bar Chart.

### Parte 3

11. Que mapa considera ser o mais apropriado para representar o número de novos casos confirmados de COVID-19\* por concelho desde o início da pandemia ?

\*incidência

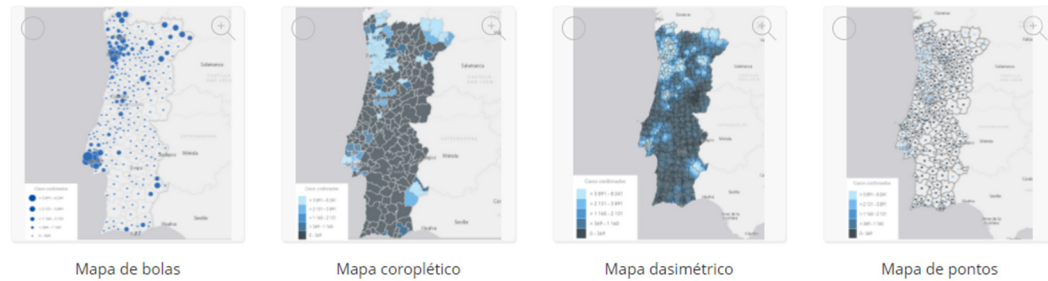

**Figure S6.** Example of screen in Part 3. Trans. What map do you consider to be the most appropriate to represent a number of new confirmed COVID-19 cases per municipality (incidence) since the beginning of pandemic? – Bubble Map; - Choropleth Map; - Dasymetric Map; Point Map.

### Conclusão

Muito obrigado pelo seu tempo e contributo.

A próxima ronda tem início previsto no dia 1 de agosto de 2021. Para participar, irá receber um e-mail com o convite e link de acesso.

Caso tenha alguma questão relacionada com o processo Web-Delphi, poderá entrar em contacto através do e-mail [ekaterina.ignatenko@tecnico.ulisboa.pt](mailto:ekaterina.ignatenko@tecnico.ulisboa.pt).

Indique p.f. o seu e-mail para receber o convite para participar na segunda ronda (este e-mail só será usado para este efeito) \*

12345@mail.com

Caso tenha alguma sugestão ou comentário sobre este questionário, poderá preencher o seguinte campo:

Voltar

Terminar

**Figure S7.** Conclusion screen. Trans. Thank you very much for your time and contribution. The next round is scheduled to start on August 1, 2021. To participate, you will receive an email with an invitation and access link. If you have any questions related to the Web-Delphi process, you can contact us via e-mail [ekaterina.ignatenko@tecnico.ulisboa.pt](mailto:ekaterina.ignatenko@tecnico.ulisboa.pt). Please enter your e-mail address to receive the invitation to participate in the second round (this e-mail will only be used for this purpose). If you have any suggestions or comments about this questionnaire, you can fill in the following field.

## Supplementary Material S2

**Table S1.** Questionnaire responses for the first round.

| Nº | Gender | Age group     | Highest education level    | Have the professional activity related with health sector | Are familiar with COVID-19 dashboards | Question 1   | Question 2   | Question 3   | Question 4   |
|----|--------|---------------|----------------------------|-----------------------------------------------------------|---------------------------------------|--------------|--------------|--------------|--------------|
| 1  | Male   | 20 - 29 years | Bachelor's degree          | Don't exercise any professional activity                  | Yes                                   | Column Chart | Line Chart   | Area Chart   | Area Chart   |
| 2  | Male   | 20 - 29 years | Bachelor's degree          | Yes                                                       | No                                    | Line Chart   | Column Chart | Line Chart   | Column Chart |
| 3  | Female | 20 - 29 years | Master's degree            | Yes                                                       | Yes                                   | Area Chart   | Table        | Area Chart   | Table        |
| 4  | Female | 20 - 29 years | Master's degree            | No                                                        | No                                    | Line Chart   | Table        | Column Chart | Column Chart |
| 5  | Female | 20 - 29 years | Master's degree            | Yes                                                       | No                                    | Area Chart   | Area Chart   | Line Chart   | Line Chart   |
| 6  | Female | 20 - 29 years | Master's degree            | No                                                        | No                                    | Line Chart   | Column Chart | Line Chart   | Area Chart   |
| 7  | Male   | 20 - 29 years | Bachelor's degree          | No                                                        | Yes                                   | Column Chart | Line Chart   | Area Chart   | Column Chart |
| 8  | Female | 20 - 29 years | Bachelor's degree          | No                                                        | No                                    | Area Chart   | Column Chart | Line Chart   | Column Chart |
| 9  | Male   | 20 - 29 years | High School                | No                                                        | No                                    | Area Chart   | Line Chart   | Column Chart | Line Chart   |
| 10 | Female | 20 - 29 years | Techno-professional School | No                                                        | Yes                                   | Column Chart | Table        | Column Chart | Column Chart |
| 11 | Male   | 20 - 29 years | Master's degree            | Yes                                                       | Yes                                   | Line Chart   | Table        | Column Chart | Column Chart |
| 12 | Male   | 20 - 29 years | Bachelor's degree          | No                                                        | Yes                                   | Line Chart   | Line Chart   | Line Chart   | Line Chart   |
| 13 | Male   | 30 - 39 years | Master's degree            | No                                                        | Yes                                   | Table        | Table        | Table        | Table        |
| 14 | Female | 0 - 19 years  | High School                | Don't exercise any professional activity                  | No                                    | Line Chart   | Column Chart | Area Chart   | Column Chart |
| 15 | Female | 20 - 29 years | Bachelor's degree          | Yes                                                       | Yes                                   | Line Chart   | Column Chart | Line Chart   | Column Chart |
| 16 | Female | 20 - 29 years | Master's degree            | No                                                        | Yes                                   | Area Chart   | Column Chart | Area Chart   | Area Chart   |
| 17 | Male   | 20 - 29 years | Master's degree            | No                                                        | Yes                                   | Area Chart   | Column Chart | Line Chart   | Line Chart   |
| 18 | Male   | 20 - 29 years | Bachelor's degree          | Don't exercise any professional activity                  | Yes                                   | Line Chart   | Line Chart   | Column Chart | Line Chart   |
| 19 | Female | 20 - 29 years | Master's degree            | Yes                                                       | Yes                                   | Column Chart | Column Chart | Column Chart | Column Chart |

|    |        |               |                            |                                          |     |            |              |              |              |
|----|--------|---------------|----------------------------|------------------------------------------|-----|------------|--------------|--------------|--------------|
| 20 | Female | 20 - 29 years | Bachelor's degree          | Don't exercise any professional activity | Yes | Line Chart | Line Chart   | Line Chart   | Line Chart   |
| 21 | Female | 20 - 29 years | High School                | No                                       | No  | Area Chart | Table        | Line Chart   | Column Chart |
| 22 | Female | 20 - 29 years | Master's degree            | No                                       | Yes | Area Chart | Line Chart   | Line Chart   | Line Chart   |
| 23 | Female | 20 - 29 years | Bachelor's degree          | No                                       | Yes | Area Chart | Line Chart   | Line Chart   | Line Chart   |
| 24 | Male   | 40 - 49 years | Techno-professional School | No                                       | Yes | Area Chart | Area Chart   | Area Chart   | Area Chart   |
| 25 | Female | 20 - 29 years | Master's degree            | No                                       | Yes | Line Chart | Column Chart | Column Chart | Column Chart |
| 26 | Male   | 20 - 29 years | Master's degree            | No                                       | No  | Line Chart | Line Chart   | Table        | Table        |
| 27 | Female | 0 - 19 years  | High School                | Don't exercise any professional activity | No  | Area Chart | Line Chart   | Line Chart   | Line Chart   |
| 28 | Female | 20 - 29 years | Master's degree            | No                                       | No  | Area Chart | Table        | Line Chart   | Table        |
| 29 | Female | 20 - 29 years | High School                | Don't exercise any professional activity | Yes | Area Chart | Column Chart | Area Chart   | Column Chart |
| 30 | Female | 20 - 29 years | Bachelor's degree          | Yes                                      | Yes | Line Chart | Line Chart   | Column Chart | Column Chart |
| 31 | Female | 50 - 59 years | Bachelor's degree          | No                                       | No  | Table      | Line Chart   | Line Chart   | Column Chart |
| 32 | Female | 20 - 29 years | Master's degree            | Yes                                      | Yes | Line Chart | Column Chart | Area Chart   | Column Chart |
| 33 | Female | 20 - 29 years | Master's degree            | No                                       | No  | Line Chart | Line Chart   | Line Chart   | Line Chart   |
| 34 | Female | 20 - 29 years | Bachelor's degree          | Yes                                      | Yes | Table      | Column Chart | Table        | Column Chart |
| 35 | Female | 20 - 29 years | Bachelor's degree          | Yes                                      | Yes | Area Chart | Column Chart | Line Chart   | Column Chart |
| 36 | Female | 20 - 29 years | Bachelor's degree          | Yes                                      | Yes | Table      | Line Chart   | Line Chart   | Line Chart   |
| 37 | Female | 20 - 29 years | High School                | Don't exercise any professional activity | No  | Area Chart | Line Chart   | Area Chart   | Line Chart   |
| 38 | Male   | 20 - 29 years | Bachelor's degree          | Don't exercise any professional activity | Yes | Line Chart | Column Chart | Area Chart   | Column Chart |
| 39 | Female | 20 - 29 years | Master's degree            | No                                       | Yes | Table      | Column Chart | Table        | Column Chart |
| 40 | Female | 20 - 29 years | Bachelor's degree          | Yes                                      | No  | Line Chart | Column Chart | Table        | Table        |
| 41 | Female | 20 - 29 years | Bachelor's degree          | Yes                                      | No  | Line Chart | Column Chart | Line Chart   | Line Chart   |
| 42 | Female | 20 - 29 years | Bachelor's degree          | Yes                                      | No  | Table      | Line Chart   | Column Chart | Line Chart   |

|    |        |               |                            |                                          |     |              |              |              |              |
|----|--------|---------------|----------------------------|------------------------------------------|-----|--------------|--------------|--------------|--------------|
| 43 | Female | 50 - 59 years | Bachelor's degree          | No                                       | No  | Table        | Table        | Line Chart   | Line Chart   |
| 44 | Female | 20 - 29 years | High School                | Yes                                      | No  | Line Chart   | Line Chart   | Area Chart   | Area Chart   |
| 45 | Female | 20 - 29 years | Master's degree            | Yes                                      | Yes | Area Chart   | Column Chart | Column Chart | Column Chart |
| 46 | Female | 20 - 29 years | Bachelor's degree          | Yes                                      | Yes | Column Chart | Column Chart | Column Chart | Column Chart |
| 47 | Female | 0 - 19 years  | High School                | Don't exercise any professional activity | No  | Line Chart   | Column Chart | Line Chart   | Line Chart   |
| 48 | Female | 20 - 29 years | Master's degree            | No                                       | Yes | Line Chart   | Line Chart   | Column Chart | Column Chart |
| 49 | Male   | 20 - 29 years | Master's degree            | Yes                                      | Yes | Line Chart   | Line Chart   | Area Chart   | Column Chart |
| 50 | Female | 20 - 29 years | Bachelor's degree          | No                                       | No  | Line Chart   | Column Chart | Table        | Column Chart |
| 51 | Male   | 20 - 29 years | Master's degree            | Yes                                      | Yes | Column Chart | Area Chart   | Line Chart   | Line Chart   |
| 52 | Female | 50 - 59 years | Techno-professional School | Yes                                      | No  | Column Chart | Column Chart | Line Chart   | Column Chart |
| 53 | Male   | 20 - 29 years | Master's degree            | No                                       | No  | Column Chart | Line Chart   | Line Chart   | Line Chart   |
| 54 | Female | 20 - 29 years | Bachelor's degree          | No                                       | No  | Area Chart   | Column Chart | Line Chart   | Line Chart   |
| 55 | Female | 20 - 29 years | Bachelor's degree          | No                                       | Yes | Table        | Line Chart   | Line Chart   | Column Chart |
| 56 | Male   | 20 - 29 years | Master's degree            | No                                       | Yes | Line Chart   | Line Chart   | Column Chart | Column Chart |
| 57 | Female | 20 - 29 years | Bachelor's degree          | Yes                                      | Yes | Column Chart | Column Chart | Column Chart | Line Chart   |
| 58 | Male   | 20 - 29 years | Master's degree            | No                                       | No  | Line Chart   | Column Chart | Area Chart   | Area Chart   |
| 59 | Female | 20 - 29 years | Master's degree            | No                                       | No  | Column Chart | Table        | Column Chart | Column Chart |
| 60 | Female | 20 - 29 years | Master's degree            | Don't exercise any professional activity | Yes | Line Chart   | Column Chart | Area Chart   | Line Chart   |
| 61 | Male   | 20 - 29 years | High School                | No                                       | No  | Column Chart | Line Chart   | Line Chart   | Column Chart |
| 62 | Female | 20 - 29 years | High School                | Don't exercise any professional activity | No  | Table        | Table        | Column Chart | Table        |
| 63 | Female | 40 - 49 years | Master's degree            | No                                       | Yes | Line Chart   | Table        | Line Chart   | Table        |
| 64 | Female | 0 - 19 years  | Bachelor's degree          | Yes                                      | No  | Line Chart   | Line Chart   | Line Chart   | Line Chart   |
| 65 | Male   | 20 - 29 years | Bachelor's degree          | No                                       | No  | Line Chart   | Line Chart   | Line Chart   | Area Chart   |
| 66 | Male   | 20 - 29 years | Bachelor's degree          | No                                       | No  | Line Chart   | Area Chart   | Line Chart   | Column Chart |
| 67 | Male   | 20 - 29 years | Bachelor's degree          | Don't exercise any professional activity | Yes | Column Chart | Line Chart   | Area Chart   | Area Chart   |

|    |        |               |                            |                                          |     |              |              |            |              |
|----|--------|---------------|----------------------------|------------------------------------------|-----|--------------|--------------|------------|--------------|
| 68 | Male   | 20 - 29 years | Techno-professional School | No                                       | No  | Column Chart | Table        | Line Chart | Table        |
| 69 | Female | 20 - 29 years | Bachelor's degree          | Yes                                      | Yes | Line Chart   | Line Chart   | Line Chart | Column Chart |
| 70 | Female | 20 - 29 years | Master's degree            | No                                       | No  | Area Chart   | Area Chart   | Line Chart | Column Chart |
| 71 | Male   | 20 - 29 years | Techno-professional School | No                                       | No  | Table        | Column Chart | Line Chart | Column Chart |
| 72 | Female | 20 - 29 years | Master's degree            | Don't exercise any professional activity | Yes | Area Chart   | Column Chart | Line Chart | Column Chart |

| Nº | Question 5           | Question 6           | Question 7             | Question 8             | Question 9   | Question 10          | Question 11    | Question 12                                    |
|----|----------------------|----------------------|------------------------|------------------------|--------------|----------------------|----------------|------------------------------------------------|
| 1  | Line Chart           | Line Chart           | Pie Chart              | Donut Chart            | Column Chart | Stacked Column Chart | Choropleth map | A risk is constant within administrative limit |
| 2  | Area Chart           | Line Chart           | Bar Chart              | Bar Chart              | Column Chart | Two-sided Bar Chart  | Choropleth map | A risk is continuous in the space              |
| 3  | Table                | Table                | Pie Chart              | Pie Chart              | Table        | Table                | Choropleth map | A risk is continuous in the space              |
| 4  | Stacked Column Chart | Column Chart         | Column Chart           | Column Chart           | Table        | Grouped Column Chart | Choropleth map | A risk is constant within administrative limit |
| 5  | Line Chart           | Line Chart           | Column Chart           | Donut Chart            | Column Chart | Stacked Column Chart | Choropleth map | A risk is constant within administrative limit |
| 6  | Area Chart           | Stacked Column Chart | Pie Chart              | Pie Chart              | Column Chart | Two-sided Bar Chart  | Choropleth map | A risk is constant within administrative limit |
| 7  | Table                | Column Chart         | Pie Chart              | 100% Stacked Bar Chart | Donut Chart  | Two-sided Bar Chart  | Choropleth map | A risk is constant within administrative limit |
| 8  | Stacked Column Chart | Stacked Column Chart | 100% Stacked Bar Chart | Pie Chart              | Pie Chart    | Two-sided Bar Chart  | Bubble map     | A risk is constant within administrative limit |
| 9  | Stacked Column Chart | Line Chart           | Donut Chart            | Donut Chart            | Pie Chart    | Two-sided Bar Chart  | Choropleth map | A risk is continuous in the space              |
| 10 | Table                | Column Chart         | Column Chart           | Column Chart           | Column Chart | Two-sided Bar Chart  | Choropleth map | A risk is continuous in the space              |
| 11 | Line Chart           | Stacked Column Chart | Donut Chart            | 100% Stacked Bar Chart | Donut Chart  | Two-sided Bar Chart  | Dasymeric map  | A risk is constant within administrative limit |
| 12 | Line Chart           | Line Chart           | Column Chart           | Column Chart           | Column Chart | Grouped Column Chart | Dasymeric map  | A risk is constant within administrative limit |

|    |                      |              |                        |              |              |                             |                |                                                |
|----|----------------------|--------------|------------------------|--------------|--------------|-----------------------------|----------------|------------------------------------------------|
| 13 | Table                | Table        | Donut Chart            | Pie Chart    | Donut Chart  | Stacked Column Chart a 100% | Choropleth map | A risk is constant within administrative limit |
| 14 | Area Chart           | Column Chart | Pie Chart              | Pie Chart    | Donut Chart  | Two-sided Bar Chart         | Dasymetric map | A risk is constant within administrative limit |
| 15 | Table                | Column Chart | Bar Chart              | Pie Chart    | Column Chart | Two-sided Bar Chart         | Choropleth map | A risk is constant within administrative limit |
| 16 | Line Chart           | Column Chart | Bar Chart              | Pie Chart    | Bar Chart    | Two-sided Bar Chart         | Dasymetric map | A risk is continuous in the space              |
| 17 | Area Chart           | Line Chart   | Column Chart           | Pie Chart    | Pie Chart    | Two-sided Bar Chart         | Bubble map     | A risk is continuous in the space              |
| 18 | Column Chart         | Column Chart | Bar Chart              | Column Chart | Bar Chart    | Two-sided Bar Chart         | Bubble map     | A risk is constant within administrative limit |
| 19 | Column Chart         | Column Chart | Column Chart           | Pie Chart    | Bar Chart    | Two-sided Bar Chart         | Choropleth map | A risk is continuous in the space              |
| 20 | Line Chart           | Line Chart   | Bar Chart              | Donut Chart  | Bar Chart    | Two-sided Bar Chart         | Dasymetric map | A risk is continuous in the space              |
| 21 | Line Chart           | Table        | Column Chart           | Pie Chart    | Table        | Table                       | Bubble map     | A risk is constant within administrative limit |
| 22 | Line Chart           | Line Chart   | Table                  | Pie Chart    | Pie Chart    | Two-sided Bar Chart         | Choropleth map | A risk is constant within administrative limit |
| 23 | Line Chart           | Area Chart   | Bar Chart              | Pie Chart    | Bar Chart    | Two-sided Bar Chart         | Choropleth map | A risk is constant within administrative limit |
| 24 | Stacked Column Chart | Area Chart   | Pie Chart              | Pie Chart    | Pie Chart    | Two-sided Bar Chart         | Bubble map     | A risk is continuous in the space              |
| 25 | Area Chart           | Column Chart | Pie Chart              | Pie Chart    | Column Chart | Stacked Column Chart a 100% | Choropleth map | A risk is constant within administrative limit |
| 26 | Line Chart           | Line Chart   | Pie Chart              | Pie Chart    | Pie Chart    | Two-sided Bar Chart         | Choropleth map | A risk is constant within administrative limit |
| 27 | Line Chart           | Line Chart   | Bar Chart              | Pie Chart    | Bar Chart    | Two-sided Bar Chart         | Bubble map     | A risk is constant within administrative limit |
| 28 | Column Chart         | Table        | Column Chart           | Pie Chart    | Column Chart | Two-sided Bar Chart         | Choropleth map | A risk is constant within administrative limit |
| 29 | Table                | Column Chart | 100% Stacked Bar Chart | Column Chart | Column Chart | Table                       | Choropleth map | A risk is constant within administrative limit |



|    |                      |                      |              |                        |              |                      |                |                                                |
|----|----------------------|----------------------|--------------|------------------------|--------------|----------------------|----------------|------------------------------------------------|
| 30 | Area Chart           | Area Chart           | Pie Chart    | Pie Chart              | Pie Chart    | Two-sided Bar Chart  | Choropleth map | A risk is constant within administrative limit |
| 31 | Area Chart           | Line Chart           | Pie Chart    | Pie Chart              | Column Chart | Grouped Column Chart | Choropleth map | A risk is constant within administrative limit |
| 32 | Line Chart           | Stacked Column Chart | Bar Chart    | Pie Chart              | Pie Chart    | Two-sided Bar Chart  | Bubble map     | A risk is constant within administrative limit |
| 33 | Stacked Column Chart | Stacked Column Chart | Pie Chart    | Pie Chart              | Table        | Table                | Choropleth map | A risk is constant within administrative limit |
| 34 | Table                | Column Chart         | Pie Chart    | Pie Chart              | Pie Chart    | Two-sided Bar Chart  | Bubble map     | A risk is continuous in the space              |
| 35 | Stacked Column Chart | Column Chart         | Bar Chart    | Pie Chart              | Bar Chart    | Grouped Column Chart | Choropleth map | A risk is constant within administrative limit |
| 36 | Area Chart           | Stacked Column Chart | Pie Chart    | Column Chart           | Column Chart | Table                | Choropleth map | A risk is continuous in the space              |
| 37 | Line Chart           | Line Chart           | Column Chart | Column Chart           | Column Chart | Two-sided Bar Chart  | Dasymetric map | A risk is continuous in the space              |
| 38 | Line Chart           | Column Chart         | Pie Chart    | Column Chart           | Pie Chart    | Grouped Column Chart | Bubble map     | A risk is continuous in the space              |
| 39 | Table                | Column Chart         | Pie Chart    | Pie Chart              | Bar Chart    | Two-sided Bar Chart  | Choropleth map | A risk is constant within administrative limit |
| 40 | Table                | Stacked Column Chart | Bar Chart    | Bar Chart              | Bar Chart    | Two-sided Bar Chart  | Choropleth map | A risk is constant within administrative limit |
| 41 | Table                | Column Chart         | Pie Chart    | Donut Chart            | Bar Chart    | Grouped Column Chart | Choropleth map | A risk is constant within administrative limit |
| 42 | Table                | Table                | Column Chart | Pie Chart              | Column Chart | Grouped Column Chart | Choropleth map | A risk is constant within administrative limit |
| 43 | Table                | Table                | Table        | Table                  | Table        | Table                | Choropleth map | A risk is constant within administrative limit |
| 44 | Line Chart           | Line Chart           | Column Chart | Pie Chart              | Column Chart | Two-sided Bar Chart  | Choropleth map | A risk is continuous in the space              |
| 45 | Table                | Line Chart           | Pie Chart    | 100% Stacked Bar Chart | Pie Chart    | Two-sided Bar Chart  | Choropleth map | A risk is constant within administrative limit |
| 46 | Stacked Column Chart | Column Chart         | Bar Chart    | Table                  | Bar Chart    | Grouped Column Chart | Bubble map     | A risk is continuous in the space              |

|    |                      |                      |              |              |                        |                             |                |                                                |
|----|----------------------|----------------------|--------------|--------------|------------------------|-----------------------------|----------------|------------------------------------------------|
| 47 | Table                | Stacked Column Chart | Pie Chart    | Column Chart | Column Chart           | Two-sided Bar Chart         | Bubble map     | A risk is constant within administrative limit |
| 48 | Stacked Column Chart | Column Chart         | Bar Chart    | Pie Chart    | Table                  | Two-sided Bar Chart         | Choropleth map | A risk is constant within administrative limit |
| 49 | Line Chart           | Stacked Column Chart | Bar Chart    | Table        | Column Chart           | Two-sided Bar Chart         | Choropleth map | A risk is continuous in the space              |
| 50 | Table                | Table                | Bar Chart    | Bar Chart    | Column Chart           | Two-sided Bar Chart         | Dasymeric map  | A risk is constant within administrative limit |
| 51 | Line Chart           | Line Chart           | Bar Chart    | Pie Chart    | Pie Chart              | Two-sided Bar Chart         | Choropleth map | A risk is constant within administrative limit |
| 52 | Area Chart           | Column Chart         | Pie Chart    | Table        | Table                  | Stacked Column Chart a 100% | Bubble map     | A risk is constant within administrative limit |
| 53 | Stacked Column Chart | Stacked Column Chart | Column Chart | Pie Chart    | Column Chart           | Two-sided Bar Chart         | Choropleth map | A risk is constant within administrative limit |
| 54 | Area Chart           | Area Chart           | Pie Chart    | Pie Chart    | Table                  | Grouped Column Chart        | Bubble map     | A risk is constant within administrative limit |
| 55 | Table                | Table                | Pie Chart    | Pie Chart    | Bar Chart              | Two-sided Bar Chart         | Bubble map     | A risk is constant within administrative limit |
| 56 | Stacked Column Chart | Column Chart         | Column Chart | Pie Chart    | 100% Stacked Bar Chart | Two-sided Bar Chart         | Choropleth map | A risk is constant within administrative limit |
| 57 | Stacked Column Chart | Column Chart         | Pie Chart    | Donut Chart  | Pie Chart              | Two-sided Bar Chart         | Choropleth map | A risk is constant within administrative limit |
| 58 | Area Chart           | Column Chart         | Column Chart | Donut Chart  | Bar Chart              | Two-sided Bar Chart         | Bubble map     | A risk is continuous in the space              |
| 59 | Line Chart           | Table                | Table        | Pie Chart    | Column Chart           | Two-sided Bar Chart         | Bubble map     | A risk is constant within administrative limit |
| 60 | Line Chart           | Line Chart           | Column Chart | Donut Chart  | Pie Chart              | Two-sided Bar Chart         | Choropleth map | A risk is constant within administrative limit |
| 61 | Line Chart           | Column Chart         | Column Chart | Pie Chart    | Donut Chart            | Two-sided Bar Chart         | Choropleth map | A risk is constant within administrative limit |
| 62 | Table                | Column Chart         | Pie Chart    | Pie Chart    | Table                  | Grouped Column Chart        | Choropleth map | A risk is constant within administrative limit |

|    |                      |                      |              |             |              |                      |                |                                                |
|----|----------------------|----------------------|--------------|-------------|--------------|----------------------|----------------|------------------------------------------------|
| 63 | Stacked Column Chart | Stacked Column Chart | Column Chart | Pie Chart   | Table        | Two-sided Bar Chart  | Choropleth map | A risk is constant within administrative limit |
| 64 | Table                | Column Chart         | Pie Chart    | Table       | Column Chart | Two-sided Bar Chart  | Choropleth map | A risk is constant within administrative limit |
| 65 | Line Chart           | Line Chart           | Column Chart | Donut Chart | Column Chart | Grouped Column Chart | Bubble map     | A risk is continuous in the space              |
| 66 | Area Chart           | Stacked Column Chart | Pie Chart    | Pie Chart   | Bar Chart    | Two-sided Bar Chart  | Choropleth map | A risk is constant within administrative limit |
| 67 | Line Chart           | Line Chart           | Pie Chart    | Donut Chart | Column Chart | Stacked Column Chart | Choropleth map | A risk is constant within administrative limit |
| 68 | Table                | Table                | Pie Chart    | Pie Chart   | Table        | Table                | Bubble map     | A risk is continuous in the space              |
| 69 | Stacked Column Chart | Column Chart         | Column Chart | Pie Chart   | Column Chart | Stacked Column Chart | Choropleth map | A risk is continuous in the space              |
| 70 | Area Chart           | Area Chart           | Pie Chart    | Pie Chart   | Donut Chart  | Grouped Column Chart | Choropleth map | A risk is constant within administrative limit |
| 71 | Table                | Stacked Column Chart | Bar Chart    | Pie Chart   | Bar Chart    | Grouped Column Chart | Bubble map     | A risk is continuous in the space              |
| 72 | Stacked Column Chart | Area Chart           | Bar Chart    | Pie Chart   | Pie Chart    | Two-sided Bar Chart  | Choropleth map | A risk is constant within administrative limit |

**Table S2.** Questionnaire responses for the second round.

| Nº | Gender | Age group    | Highest education level | Have the professional activity related with health sector | Are familiar with COVID-19 dashboards | Question 1   | Question 2 | Question 3 | Question 4 |
|----|--------|--------------|-------------------------|-----------------------------------------------------------|---------------------------------------|--------------|------------|------------|------------|
| 1  | Male   | 20 a 29 anos | Bachelor's degree       | Don't exercise any professional activity                  | Yes                                   | Column Chart | Line Chart | Line Chart | Line Chart |
| 2  | Female | 20 a 29 anos | Master's degree         | Yes                                                       | Yes                                   | Area Chart   | Table      | Line Chart | Table      |
| 3  | Female | 20 a 29 anos | Master's degree         | Yes                                                       | No                                    | Area Chart   | Line Chart | Line Chart | Line Chart |

|    |        |              |                            |                                          |     |              |              |              |              |
|----|--------|--------------|----------------------------|------------------------------------------|-----|--------------|--------------|--------------|--------------|
| 4  | Female | 20 a 29 anos | Master's degree            | No                                       | No  | Line Chart   | Column Chart | Line Chart   | Area Chart   |
| 5  | Male   | 20 a 29 anos | Bachelor's degree          | No                                       | Yes | Column Chart | Table        | Line Chart   | Column Chart |
| 6  | Male   | 20 a 29 anos | High School                | No                                       | No  | Area Chart   | Line Chart   | Column Chart | Column Chart |
| 7  | Female | 20 a 29 anos | Techno-professional School | No                                       | Yes | Column Chart | Column Chart | Column Chart | Column Chart |
| 8  | Male   | 20 a 29 anos | Master's degree            | Yes                                      | Yes | Line Chart   | Table        | Line Chart   | Column Chart |
| 9  | Male   | 20 a 29 anos | Bachelor's degree          | No                                       | Yes | Line Chart   | Line Chart   | Line Chart   | Line Chart   |
| 10 | Male   | 30 a 39 anos | Master's degree            | No                                       | Yes | Line Chart   | Table        | Line Chart   | Table        |
| 11 | Female | 0 a 19 anos  | High School                | Don't exercise any professional activity | No  | Line Chart   | Line Chart   | Line Chart   | Column Chart |
| 12 | Female | 20 a 29 anos | Bachelor's degree          | Yes                                      | Yes | Line Chart   | Column Chart | Line Chart   | Column Chart |
| 13 | Female | 20 a 29 anos | Master's degree            | No                                       | Yes | Area Chart   | Column Chart | Area Chart   | Area Chart   |
| 14 | Male   | 20 a 29 anos | Master's degree            | No                                       | Yes | Area Chart   | Column Chart | Line Chart   | Line Chart   |
| 15 | Male   | 20 a 29 anos | Bachelor's degree          | Don't exercise any professional activity | Yes | Line Chart   | Line Chart   | Line Chart   | Column Chart |
| 16 | Female | 20 a 29 anos | Master's degree            | Yes                                      | Yes | Column Chart | Column Chart | Column Chart | Column Chart |
| 17 | Female | 20 a 29 anos | Bachelor's degree          | Don't exercise any professional activity | Yes | Line Chart   | Column Chart | Line Chart   | Column Chart |
| 18 | Female | 20 a 29 anos | High School                | No                                       | No  | Line Chart   | Table        | Line Chart   | Column Chart |
| 19 | Female | 20 a 29 anos | Master's degree            | No                                       | Yes | Line Chart   | Line Chart   | Line Chart   | Column Chart |
| 20 | Female | 20 a 29 anos | Master's degree            | No                                       | Yes | Line Chart   | Column Chart | Column Chart | Column Chart |
| 21 | Male   | 20 a 29 anos | Master's degree            | No                                       | No  | Line Chart   | Line Chart   | Table        | Table        |
| 22 | Female | 0 a 19 anos  | High School                | Don't exercise any professional activity | No  | Area Chart   | Line Chart   | Line Chart   | Line Chart   |
| 23 | Female | 20 a 29 anos | Master's degree            | No                                       | No  | Table        | Table        | Line Chart   | Table        |
| 24 | Female | 20 a 29 anos | High School                | Don't exercise any professional activity | Yes | Area Chart   | Column Chart | Area Chart   | Column Chart |

|    |        |              |                   |                                          |     |              |              |              |              |
|----|--------|--------------|-------------------|------------------------------------------|-----|--------------|--------------|--------------|--------------|
|    |        |              |                   | nal activity                             |     |              |              |              |              |
| 25 | Female | 50 a 59 anos | Bachelor's degree | No                                       | No  | Line Chart   | Line Chart   | Line Chart   | Column Chart |
| 26 | Female | 20 a 29 anos | Bachelor's degree | Yes                                      | Yes | Area Chart   | Column Chart | Line Chart   | Column Chart |
| 27 | Female | 20 a 29 anos | Bachelor's degree | Yes                                      | Yes | Line Chart   | Line Chart   | Line Chart   | Column Chart |
|    |        |              |                   | Don't exercise any professional activity |     |              |              |              |              |
| 28 | Female | 20 a 29 anos | High School       | No                                       | No  | Area Chart   | Line Chart   | Area Chart   | Column Chart |
|    |        |              |                   | Don't exercise any professional activity |     |              |              |              |              |
| 29 | Male   | 20 a 29 anos | Bachelor's degree | Yes                                      | Yes | Line Chart   | Column Chart | Area Chart   | Column Chart |
|    |        |              |                   | Don't exercise any professional activity |     |              |              |              |              |
| 30 | Female | 20 a 29 anos | Master's degree   | No                                       | Yes | Table        | Column Chart | Table        | Column Chart |
| 31 | Female | 20 a 29 anos | Bachelor's degree | Yes                                      | No  | Table        | Line Chart   | Line Chart   | Column Chart |
| 32 | Female | 20 a 29 anos | High School       | Yes                                      | No  | Line Chart   | Column Chart | Line Chart   | Column Chart |
| 33 | Female | 20 a 29 anos | Master's degree   | Yes                                      | Yes | Column Chart | Column Chart | Area Chart   | Column Chart |
| 34 | Female | 20 a 29 anos | Bachelor's degree | Yes                                      | Yes | Column Chart | Column Chart | Column Chart | Column Chart |
| 35 | Female | 20 a 29 anos | Master's degree   | No                                       | Yes | Column Chart | Column Chart | Line Chart   | Column Chart |
| 36 | Male   | 20 a 29 anos | Master's degree   | Yes                                      | Yes | Line Chart   | Column Chart | Area Chart   | Column Chart |
| 37 | Male   | 20 a 29 anos | Master's degree   | Yes                                      | Yes | Column Chart | Area Chart   | Line Chart   | Line Chart   |
| 38 | Male   | 20 a 29 anos | Master's degree   | No                                       | No  | Column Chart | Line Chart   | Line Chart   | Line Chart   |
| 39 | Male   | 20 a 29 anos | Master's degree   | No                                       | Yes | Line Chart   | Line Chart   | Column Chart | Column Chart |
| 40 | Female | 20 a 29 anos | Bachelor's degree | Yes                                      | Yes | Column Chart | Line Chart   | Line Chart   | Line Chart   |
| 41 | Male   | 20 a 29 anos | Master's degree   | No                                       | No  | Line Chart   | Column Chart | Area Chart   | Area Chart   |
|    |        |              |                   | Don't exercise any professional activity |     |              |              |              |              |
| 42 | Female | 20 a 29 anos | Master's degree   | Yes                                      | Yes | Line Chart   | Column Chart | Area Chart   | Line Chart   |
|    |        |              |                   | Don't exercise any professional activity |     |              |              |              |              |
| 43 | Female | 20 a 29 anos | High School       | No                                       | No  | Table        | Table        | Table        | Table        |
|    |        |              |                   | Don't exercise any professional activity |     |              |              |              |              |
| 44 | Male   | 20 a 29 anos | Bachelor's degree | No                                       | No  | Line Chart   | Column Chart | Line Chart   | Line Chart   |
| 45 | Male   | 20 a 29 anos | Bachelor's degree | No                                       | No  | Line Chart   | Column Chart | Line Chart   | Column Chart |
|    |        |              |                   | Don't exercise any                       |     |              |              |              |              |
| 46 | Male   | 20 a 29 anos | Bachelor's degree | Yes                                      | Yes | Column Chart | Column Chart | Line Chart   | Column Chart |

|    |      |              |                            |                             |    |              |       |            |              |
|----|------|--------------|----------------------------|-----------------------------|----|--------------|-------|------------|--------------|
| 47 | Male | 20 a 29 anos | Techno-professional School | professional activity<br>No | No | Column Chart | Table | Line Chart | Column Chart |
|----|------|--------------|----------------------------|-----------------------------|----|--------------|-------|------------|--------------|

| N <sub>o</sub> | Question 5           | Question 6           | Question 7   | Question 8             | Question 9   | Question 10          | Question 11    | Question 12                                    |
|----------------|----------------------|----------------------|--------------|------------------------|--------------|----------------------|----------------|------------------------------------------------|
|                | Line Chart           | Line Chart           | Column Chart | Pie Chart              | Column Chart | Two-sided Bar Chart  | Choropleth map | A risk is constant within administrative limit |
|                | Table                | Table                | Pie Chart    | Pie Chart              | Table        | Table                | Choropleth map | A risk is continuous in the space              |
|                | Line Chart           | Line Chart           | Pie Chart    | Pie Chart              | Column Chart | Stacked Column Chart | Choropleth map | A risk is constant within administrative limit |
|                | Stacked Column Chart | Stacked Column Chart | Pie Chart    | Pie Chart              | Pie Chart    | Two-sided Bar Chart  | Choropleth map | A risk is constant within administrative limit |
|                | Column Chart         | Column Chart         | Donut Chart  | 100% Stacked Bar Chart | Donut Chart  | Two-sided Bar Chart  | Choropleth map | A risk is constant within administrative limit |
|                | Table                | Column Chart         | Donut Chart  | Donut Chart            | Pie Chart    | Two-sided Bar Chart  | Choropleth map | A risk is continuous in the space              |
|                | Column Chart         | Column Chart         | Column Chart | Column Chart           | Column Chart | Two-sided Bar Chart  | Choropleth map | A risk is continuous in the space              |
|                | Line Chart           | Table                | Pie Chart    | Donut Chart            | Donut Chart  | Two-sided Bar Chart  | Choropleth map | A risk is constant within administrative limit |
|                | Line Chart           | Line Chart           | Column Chart | Column Chart           | Column Chart | Two-sided Bar Chart  | Choropleth map | A risk is constant within administrative limit |
|                | Line Chart           | Table                | Bar Chart    | Donut Chart            | Donut Chart  | Stacked Column Chart | Choropleth map | A risk is constant within administrative limit |
|                | Line Chart           | Column Chart         | Pie Chart    | Pie Chart              | Bar Chart    | Two-sided Bar Chart  | Choropleth map | A risk is constant within administrative limit |
|                | Table                | Column Chart         | Bar Chart    | Pie Chart              | Column Chart | Two-sided Bar Chart  | Choropleth map | A risk is constant                             |

|              |                      |              |              |              |                      |                     |                                                                  |
|--------------|----------------------|--------------|--------------|--------------|----------------------|---------------------|------------------------------------------------------------------|
| Line Chart   | Column Chart         | Bar Chart    | Pie Chart    | Bar Chart    | Two-sided Bar Chart  | Dasymetric map      | within administrative limit<br>A risk is continuous in the space |
|              | Area Chart           | Line Chart   | Column Chart | Pie Chart    | Column Chart         | Two-sided Bar Chart | Bubble map<br>A risk is constant within administrative limit     |
|              | Stacked Column Chart | Column Chart | Column Chart | Pie Chart    | Column Chart         | Two-sided Bar Chart | Choropleth map<br>A risk is constant within administrative limit |
|              | Column Chart         | Column Chart | Column Chart | Pie Chart    | Column Chart         | Two-sided Bar Chart | Choropleth map<br>A risk is continuous in the space              |
| Line Chart   | Column Chart         | Bar Chart    | Pie Chart    | Column Chart | Two-sided Bar Chart  | Choropleth map      | A risk is constant within administrative limit                   |
| Line Chart   | Table                | Column Chart | Pie Chart    | Column Chart | Two-sided Bar Chart  | Bubble map          | A risk is constant within administrative limit                   |
| Line Chart   | Line Chart           | Bar Chart    | Pie Chart    | Bar Chart    | Two-sided Bar Chart  | Choropleth map      | A risk is constant within administrative limit                   |
| Area Chart   | Column Chart         | Pie Chart    | Pie Chart    | Pie Chart    | Stacked Column Chart | Choropleth map      | A risk is constant within administrative limit                   |
| Line Chart   | Line Chart           | Pie Chart    | Pie Chart    | Pie Chart    | Two-sided Bar Chart  | Choropleth map      | A risk is constant within administrative limit                   |
| Line Chart   | Line Chart           | Bar Chart    | Pie Chart    | Bar Chart    | Two-sided Bar Chart  | Choropleth map      | A risk is constant within administrative limit                   |
| Column Chart | Table                | Column Chart | Pie Chart    | Column Chart | Two-sided Bar Chart  | Choropleth map      | A risk is constant within administrative limit                   |
| Table        | Column Chart         | Bar Chart    | Pie Chart    | Column Chart | Table                | Choropleth map      | A risk is constant within administrative limit                   |
| Table        | Line Chart           | Pie Chart    | Pie Chart    | Column Chart | Two-sided Bar Chart  | Choropleth map      | A risk is constant                                               |

|                                                                                                                                      |                      |                      |              |                        |              |                      |                |                                                                               |
|--------------------------------------------------------------------------------------------------------------------------------------|----------------------|----------------------|--------------|------------------------|--------------|----------------------|----------------|-------------------------------------------------------------------------------|
| <div> <div></div> </div> | Stacked Column Chart | Column Chart         | Bar Chart    | Pie Chart              | Bar Chart    | Two-sided Bar Chart  | Choropleth map | within administrative limit<br>A risk is constant within administrative limit |
|                                                                                                                                      | Line Chart           | Column Chart         | Column Chart | Pie Chart              | Column Chart | Two-sided Bar Chart  | Choropleth map | A risk is constant within administrative limit                                |
|                                                                                                                                      | Line Chart           | Line Chart           | Column Chart | Column Chart           | Column Chart | Two-sided Bar Chart  | Dasymetric map | A risk is continuous in the space                                             |
|                                                                                                                                      | Line Chart           | Column Chart         | Pie Chart    | Pie Chart              | Pie Chart    | Two-sided Bar Chart  | Bubble map     | A risk is constant within administrative limit                                |
|                                                                                                                                      | Table                | Column Chart         | Pie Chart    | Pie Chart              | Bar Chart    | Two-sided Bar Chart  | Choropleth map | A risk is constant within administrative limit                                |
|                                                                                                                                      | Column Chart         | Column Chart         | Column Chart | Pie Chart              | Column Chart | Grouped Column Chart | Choropleth map | A risk is constant within administrative limit                                |
|                                                                                                                                      | Line Chart           | Column Chart         | Column Chart | Pie Chart              | Column Chart | Two-sided Bar Chart  | Choropleth map | A risk is constant within administrative limit                                |
|                                                                                                                                      | Table                | Area Chart           | Bar Chart    | 100% Stacked Bar Chart | Pie Chart    | Two-sided Bar Chart  | Choropleth map | A risk is constant within administrative limit                                |
|                                                                                                                                      | Stacked Column Chart | Column Chart         | Bar Chart    | Table                  | Bar Chart    | Grouped Column Chart | Bubble map     | A risk is constant within administrative limit                                |
|                                                                                                                                      | Stacked Column Chart | Column Chart         | Bar Chart    | Pie Chart              | Table        | Two-sided Bar Chart  | Choropleth map | A risk is constant within administrative limit                                |
|                                                                                                                                      | Line Chart           | Stacked Column Chart | Column Chart | Pie Chart              | Column Chart | Two-sided Bar Chart  | Choropleth map | A risk is constant within administrative limit                                |
|                                                                                                                                      | Line Chart           | Line Chart           | Bar Chart    | Pie Chart              | Pie Chart    | Two-sided Bar Chart  | Choropleth map | A risk is constant within administrative limit                                |



|  |                      |                      |              |             |              |                      |                |                                                |
|--|----------------------|----------------------|--------------|-------------|--------------|----------------------|----------------|------------------------------------------------|
|  | Stacked Column Chart | Stacked Column Chart | Column Chart | Pie Chart   | Column Chart | Two-sided Bar Chart  | Choropleth map | A risk is constant within administrative limit |
|  | Stacked Column Chart | Column Chart         | Column Chart | Pie Chart   | Column Chart | Two-sided Bar Chart  | Choropleth map | A risk is constant within administrative limit |
|  | Stacked Column Chart | Column Chart         | Pie Chart    | Donut Chart | Pie Chart    | Two-sided Bar Chart  | Choropleth map | A risk is constant within administrative limit |
|  | Area Chart           | Column Chart         | Column Chart | Donut Chart | Bar Chart    | Two-sided Bar Chart  | Bubble map     | A risk is continuous in the space              |
|  | Line Chart           | Line Chart           | Column Chart | Pie Chart   | Column Chart | Two-sided Bar Chart  | Choropleth map | A risk is constant within administrative limit |
|  | Table                | Column Chart         | Pie Chart    | Pie Chart   | Pie Chart    | Grouped Column Chart | Choropleth map | A risk is constant within administrative limit |
|  | Line Chart           | Column Chart         | Column Chart | Donut Chart | Column Chart | Grouped Column Chart | Bubble map     | A risk is continuous in the space              |
|  | Line Chart           | Column Chart         | Pie Chart    | Pie Chart   | Column Chart | Two-sided Bar Chart  | Choropleth map | A risk is constant within administrative limit |
|  | Line Chart           | Line Chart           | Column Chart | Pie Chart   | Column Chart | Two-sided Bar Chart  | Choropleth map | A risk is constant within administrative limit |
|  | Table                | Table                | Pie Chart    | Pie Chart   | Table        | Table                | Bubble map     | A risk is continuous in the space              |
